# Supplementary material for: Alignment of active sites on Ag–Ni catalysts for highly selective CO2 reduction to CO
Source: Royal Society of Chemistry journal article supplement (doi:10.1039/d4cy01149j), 2024-11-18
Supplement: d4cy01149j1.pdf [file d4cy01149j1.pdf]

## Supporting Information

### **Alignment of active sites on Ag-Ni catalysts for highly selective CO<sub>2</sub> Reduction to CO**

Huangdong Wang <sup>&</sup>, Zihua Guo <sup>&</sup>, Zheng Zhang, Lin Jia, Min Sun, Lifeng Han, Haorun Li, Shanghong Zeng\*

*School of Chemistry and Chemical Engineering, Inner Mongolia University, Hohhot 010021, China*

\* Corresponding author. Emails: zengshanghong@imu.edu.cn (S.H. Zeng)

## Figures and Tables

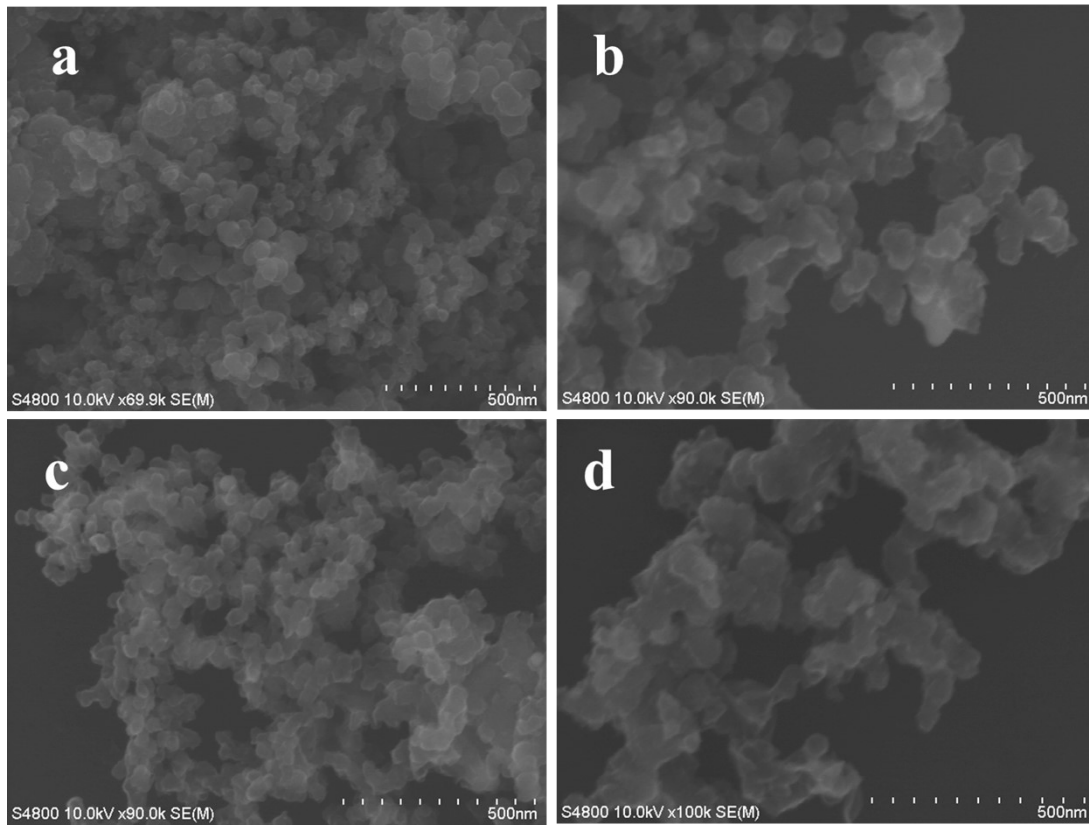

**Figure S1.** SEM images of (a) CB, (b) Ni/CB, (c) Ag/CB and (d) Ag-Ni/CB.

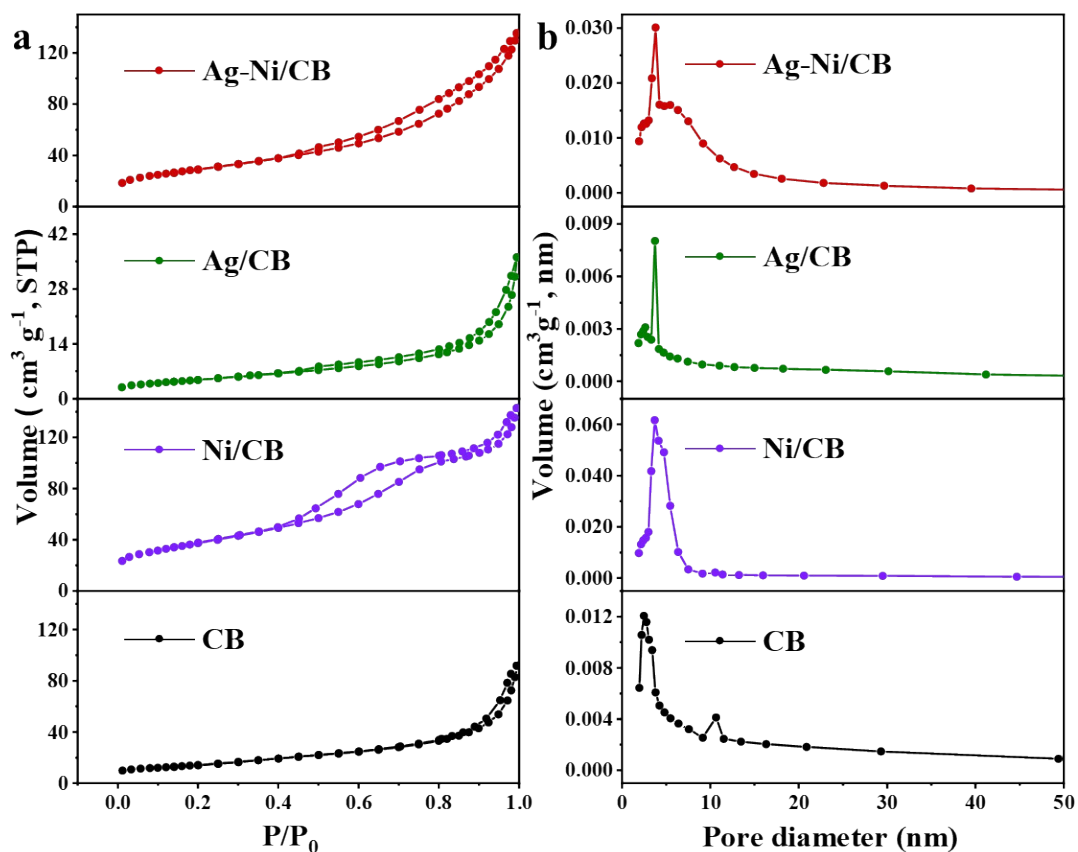

**Figure S2.** (a) N<sub>2</sub> adsorption-desorption isotherms and (b) the corresponding pore diameter distribution curves of CB, Ni/CB, Ag/CB and Ag-Ni/CB.

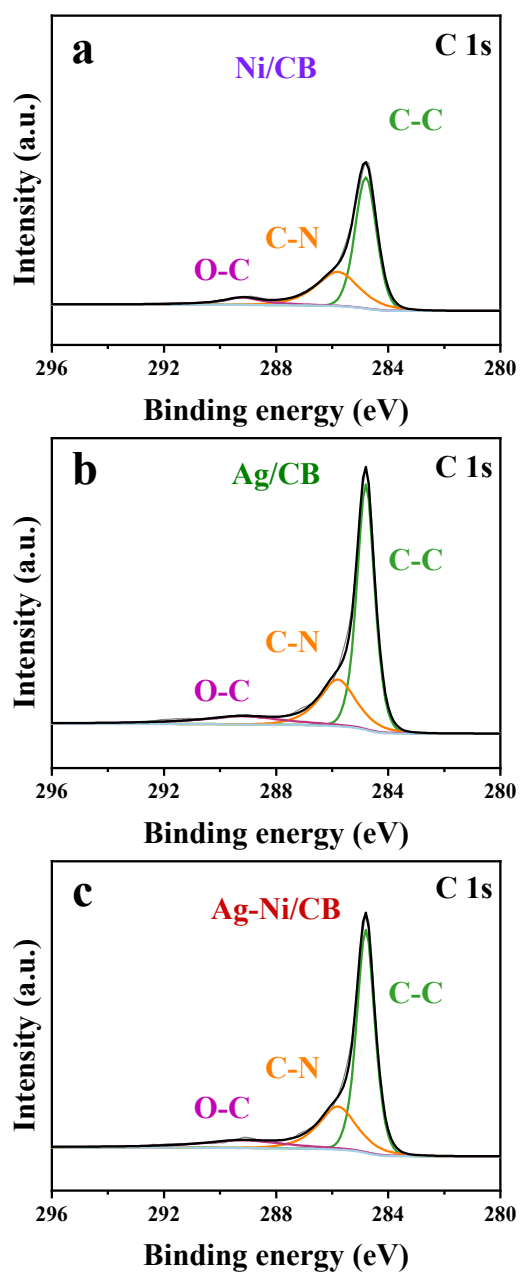

**Figure S3.** High resolution XPS spectra of C 1s for (a) Ni/CB, (b) Ag/CB and (c) Ag-Ni/CB.

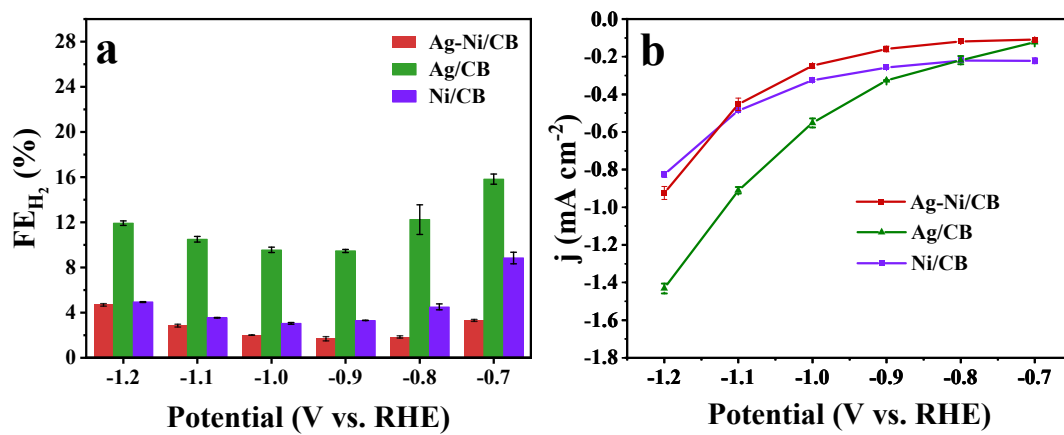

**Figure S4.** (a) Faradaic efficiencies and (b) partial current densities of H<sub>2</sub> over the Ni/CB, Ag/CB and Ag-Ni/CB at different applied potentials.

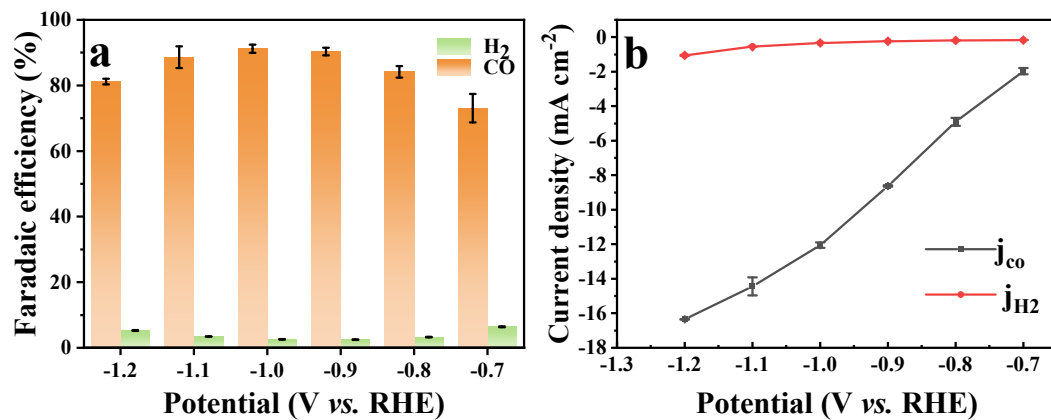

**Figure S5.** (a) Faradaic efficiencies and (b) partial current densities over the Ag-Ni/CB before acid leaching.

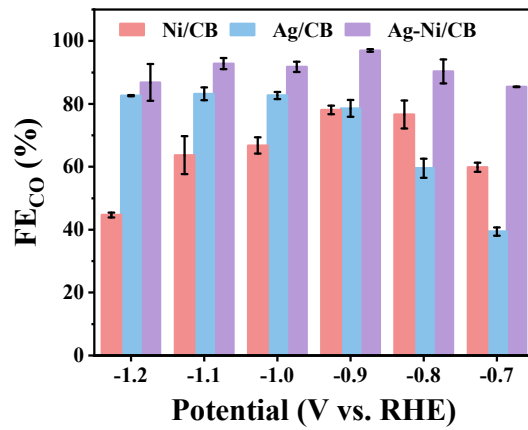

**Figure S6.** Faradaic efficiency of CO over the Ni/CB, Ag/CB and Ag-Ni/CB prepared using 1 M HCl as acid leaching solution.

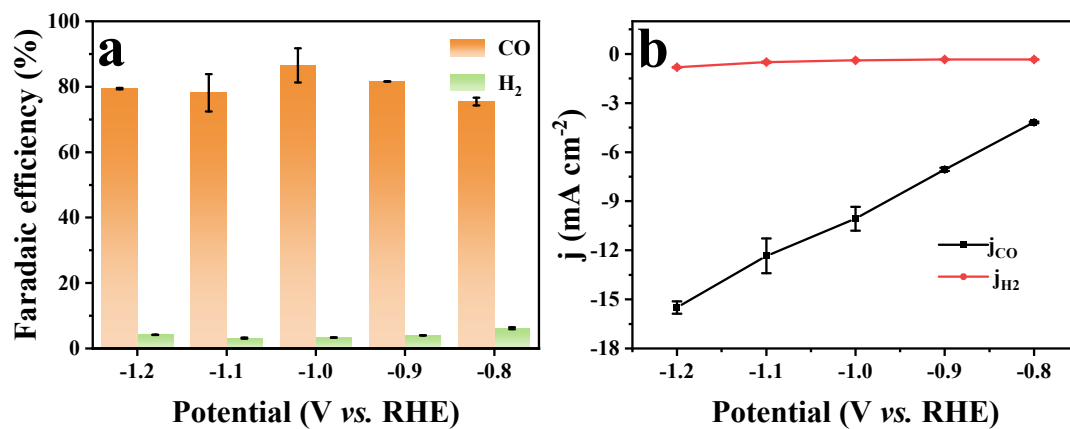

**Figure S7.** (a) Faradaic efficiencies and (b) partial current densities over the Ag-Ni/CB prepared using 1 M HNO<sub>3</sub> as acid leaching solution.



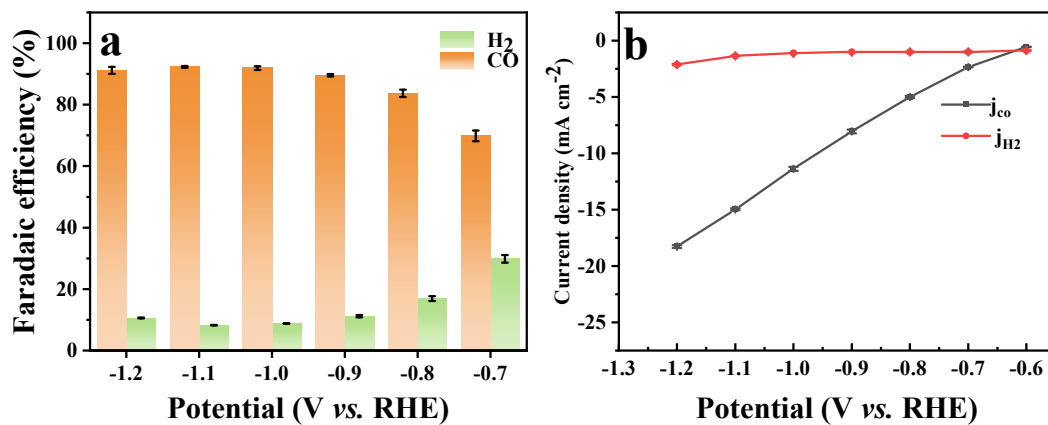

**Figure S8.** (a) Faradaic efficiencies and (b) partial current densities over the physically mixed Ag /CB and Ni/CB.

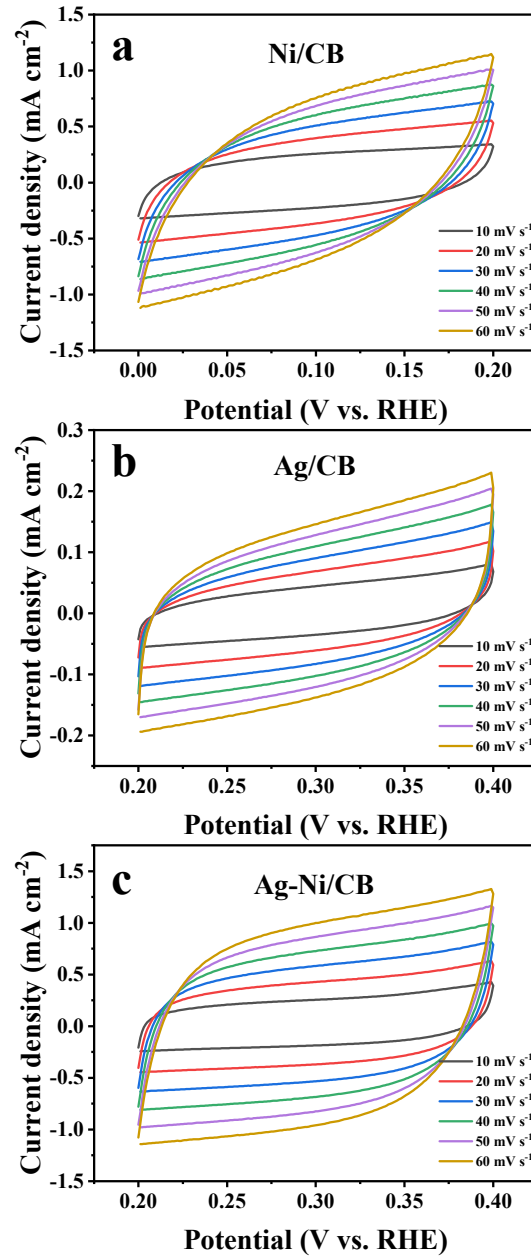

Figure S9. CV curves of the Ni/CB, Ag/CB and Ag-Ni/CB at various scan rates.

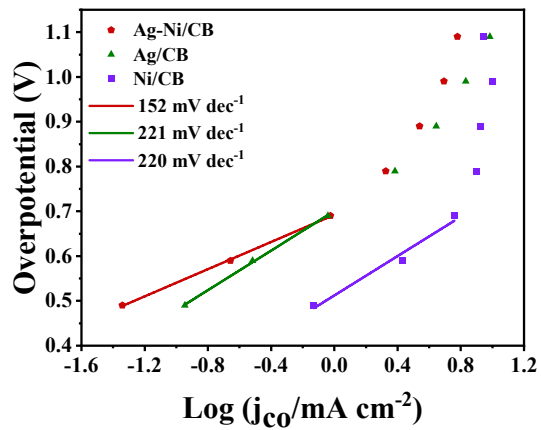

Figure S10. Tafel slopes of the Ni/CB, Ag/CB and Ag-Ni/CB catalysts.

**Table S1. ICP-OES results and textural properties of the as-synthesized samples.**

| Sample   | Ni (wt%) | Ag (wt%) | BET surface area (m <sup>2</sup> g <sup>-1</sup> ) | Pore diameter (nm) | Pore volume (cm <sup>3</sup> g <sup>-1</sup> ) | Particle Size (nm) <sup>a</sup>        |
|----------|----------|----------|----------------------------------------------------|--------------------|------------------------------------------------|----------------------------------------|
| CB       | --       | --       | 51.5                                               | 10.0               | 0.14                                           | --                                     |
| Ag/CB    | --       | 34.8     | 17.6                                               | 10.7               | 0.06                                           | 77.0 <sup>b</sup>                      |
| Ni/CB    | 13.0     | --       | 133.9                                              | 5.4                | 0.23                                           | 19.2 <sup>c</sup>                      |
| Ag-Ni/CB | 4.4      | 4.0      | 103.3                                              | 7.2                | 0.21                                           | 54.7 <sup>b</sup><br>14.3 <sup>c</sup> |

(a) Calculated from the Scherrer equation. (b) Calculated from the reflection of Ag (111) at about 38°. (c) Calculated from the reflection of Ni (200) at about 51°.

**Table S2. Surface compositions of Ni species on the catalysts according to the XPS results.**

| <b>Samples</b> | <b>Ni<sup>2+</sup> (%)</b> | <b>Ni<sup>0</sup> (%)</b> |
|----------------|----------------------------|---------------------------|
| Ag-Ni/CB       | 82.87                      | 17.13                     |
| Ni/CB          | 84.91                      | 15.09                     |

**Table S3.** Relative compositions of the different nitrogen species on the surface of samples according to the XPS results.

| <b>Samples</b> | <b>Pyrrolic N (%)</b> | <b>Pyridinic N (%)</b> | <b>Ni-N (%)</b> | <b>Graphitic N (%)</b> |
|----------------|-----------------------|------------------------|-----------------|------------------------|
| Ag-Ni/CB       | 11.6                  | 16.2                   | 45.3            | 26.9                   |
| Ag/CB          | 13.0                  | 52.3                   | --              | 34.7                   |
| Ni/CB          | 9.8                   | 27.5                   | 42.7            | 20.0                   |

**Table S4.** Comparison of CO<sub>2</sub>RR performances of this work with the previous reported results.

| Catalyst                                 | Electrolyte               | Potential (V vs. RHE) | Max FE (%) | Reference |
|------------------------------------------|---------------------------|-----------------------|------------|-----------|
| Ag-Ni/CB                                 | 0.1 M KHCO <sub>3</sub>   | -0.8                  | 99.3       | This work |
| Ag <sub>2</sub> -G                       | 0.5 M KHCO <sub>3</sub>   | -0.7                  | 93.4       | 1         |
| Ag <sub>1.01%</sub> /CuO                 | 0.1 M KHCO <sub>3</sub>   | -0.7                  | 91.2       | 2         |
| CuAg/CeO <sub>2</sub> -6                 | 0.1 M KHCO <sub>3</sub>   | -1.1                  | 84         | 3         |
| In(OH) <sub>3</sub> -Ag/C                | 0.1 M KHCO <sub>3</sub>   | -0.7                  | 93         | 4         |
| CuNi-N-CNS                               | 0.5 M KHCO <sub>3</sub>   | -0.8                  | 90         | 5         |
| Ni <sub>1</sub> N-C-800                  | 0.1 M KHCO <sub>3</sub>   | -0.86                 | 94.8       | 6         |
| Ni <sub>0.037</sub> -NG-H                | 0.5 M KHCO <sub>3</sub>   | -0.8                  | 97.3       | 7         |
| Ni@NiNCM                                 | 0.5 M KHCO <sub>3</sub>   | -0.9                  | 97.6       | 8         |
| Ni-SA-BB/C                               | 0.5 M KHCO <sub>3</sub>   | -0.9                  | 95         | 9         |
| CBNNiGd-700                              | 0.5 M KHCO <sub>3</sub>   | -1.0                  | 97         | 10        |
| I-Ni SA/NHCRs                            | 0.25 M NaHCO <sub>3</sub> | -0.80                 | 94.91      | 11        |
| Ni <sub>NP2</sub> @Ni <sub>SA2</sub> -NG | 0.25 M KHCO <sub>3</sub>  | -0.79                 | 96.6       | 12        |
| NiSAs@3D-INCT                            | 0.5 M KHCO <sub>3</sub>   | -0.86                 | 91.4       | 13        |
| CeNClCeO <sub>2</sub> /Ni/N-C            | 0.5 M KHCO <sub>3</sub>   | -0.8                  | 90         | 14        |
| Ni-NCNT-3HS                              | 0.5 M KHCO <sub>3</sub>   | -0.7                  | 97.4       | 15        |
| Ni-Ag/PC-N                               | 0.1 M KHCO <sub>3</sub>   | -0.8                  | 99.2       | 16        |
| NiSA/PCFM                                | 0.5 M KHCO <sub>3</sub>   | -0.7                  | 95         | 17        |

| <b>Catalyst</b> | <b>Electrolyte</b>      | <b>Potential<br/>(V vs. RHE)</b> | <b>Max FE<br/>(%)</b> | <b>Reference</b> |
|-----------------|-------------------------|----------------------------------|-----------------------|------------------|
| Ni-SAC/SNC      | 0.5 M KHCO <sub>3</sub> | -0.62                            | 98                    | 18               |
| Ni SAs/OMMNC    | 0.5 M KHCO <sub>3</sub> | -0.6                             | 99                    | 19               |
| NiSA-VC/NCNFs   | 0.1 M KHCO <sub>3</sub> | -0.98                            | 99.2                  | 20               |



## References

- 1 Y. Li, C. Chen, R. Cao, Z. Pan, H. He and K. Zhou, *Appl. Catal. B Environ.*, 2020, **268**, 118747.
- 2 W. Zhang, N. Zhu, L. Ding, Y. Hu and Z. Wu, *Inorg. Chem.*, 2021, **60**, 19356–19364.
- 3 M. Luo, X. Fu, S. Geng, Z. Li and M. Li, *Fuel*, 2023, **347**, 128470.
- 4 L. Fu, Z. Qu, L. Zhou and Y. Ding, *Appl. Catal. B Environ.*, 2023, **339**, 123170.
- 5 W. Pan, P. Wang, L. Fan, K. Chen, L. Yi, J. Huang, P. Cai, X. Liu, Q. Chen, G. Wang and Z. Wen, *Inorg. Chem. Front.*, 2023, **10**, 2276–2284.
- 6 X. Tan, C. Yu, S. Cui, L. Ni, W. Guo, Z. Wang, J. Chang, Y. Ren, J. Yu, H. Huang and J. Qiu, *Chem. Eng. J.*, 2022, **433**, 131965.
- 7 S. Liang, Q. Jiang, Q. Wang and Y. Liu, *Adv. Energy Mater.*, 2021, **11**, 202101477.
- 8 X. Wang, X. Sang, C. L. Dong, S. Yao, L. Shuai, J. Lu, B. Yang, Z. Li, L. Lei, M. Qiu, L. Dai and Y. Hou, *Angew. Chemie - Int. Ed.*, 2021, **60**, 11959–11965.
- 9 B. An, J. Zhou, L. Duan, X. Liu, G. Yu, T. Ren, X. Guo, Y. Li, H. Ågren, L. Wang and J. Zhang, *Adv. Sci.*, 2023, **10**, 2205639.
- 10 W. Liu, P. Bai, S. Wei, C. Yang and L. Xu, *Angew. Chemie - Int. Ed.*, 2022, **61**, e202201166.
- 11 S. Gong, S. Yang, W. Wang, R. Lu, H. Wang, X. Han, G. Wang, J. Xie, D. Rao, C. Wu, J. Liu, S. Shao and X. Lv, *Small*, 2023, **19**, 2207808.
- 12 S. Bai, L. Tan, C. Ning, G. Liu, Z. Wu, T. Shen, L. Zheng and Y. F. Song, *Small*, 2023, **19**, 202300581.
- 13 K. Wang, B. Chen, Y. Xuan, W. Fan, N. Sun, S. Chang and G. Meng, *Appl. Catal. B Environ.*, 2023, **338**, 123083.
- 14 L. Liu, F. Wang, X. Chu, L. Zhang, S. Zhang, X. Wang, G. Che, S. Song and H. Zhang, *Adv. Energy Mater.*, 2024, **14**, 4–10.
- 15 R. Boppella, Y. Kim, K. A. Joshi Reddy, I. Song, Y. Eom, E. Sim and T. K. Kim, *Appl. Catal. B Environ.*, 2024, **345**, 123699.
- 16 Z. Guo, H. Zhu, G. Yang, A. Wu, Q. Chen, Z. Yan, K. Loon Fow, H. Do, J. D. Hirst, T. Wu and M. Xu, *Chem. Eng. J.*, 2023, **476**, 146556.
- 17 H. Yang, Q. Lin, C. Zhang, X. Yu, Z. Cheng, G. Li, Q. Hu, X. Ren, Q. Zhang, J. Liu and C. He, *Nat. Commun.*, 2020, **11**, 1–8.
- 18 X. Sun, L. Wang, X. Lan, Q. Lu, Y. Tuo, C. Ye, D. Wang and C. Xu, *Appl. Catal. B Environ.*, 2024, **342**, 123389.
- 19 X. Li, S. G. Han, W. Wu, K. Zhang, B. Chen, S. H. Zhou, D. D. Ma, W. Wei, X. T. Wu, R. Zou and Q. L. Zhu, *Energy Environ. Sci.*, 2022, **16**, 502–512.
- 20 J. Hao, H. Zhu, Z. Zhuang, Q. Zhao, R. Yu, J. Hao, Q. Kang, S. Lu, X. Wang, J. Wu, D. Wang and M. Du, *ACS Nano*, 2023, **17**, 6955–6965.
